# Supplementary material for: Identification of plastid genomic regions inferring species identity from de novo plastid genome assembly of 14 Korean-native Iris species (Iridaceae)
Source: PubMed Central journal article supplement (PMC7588056; doi:10.1371/journal.pone.0241178), 2020-10-26

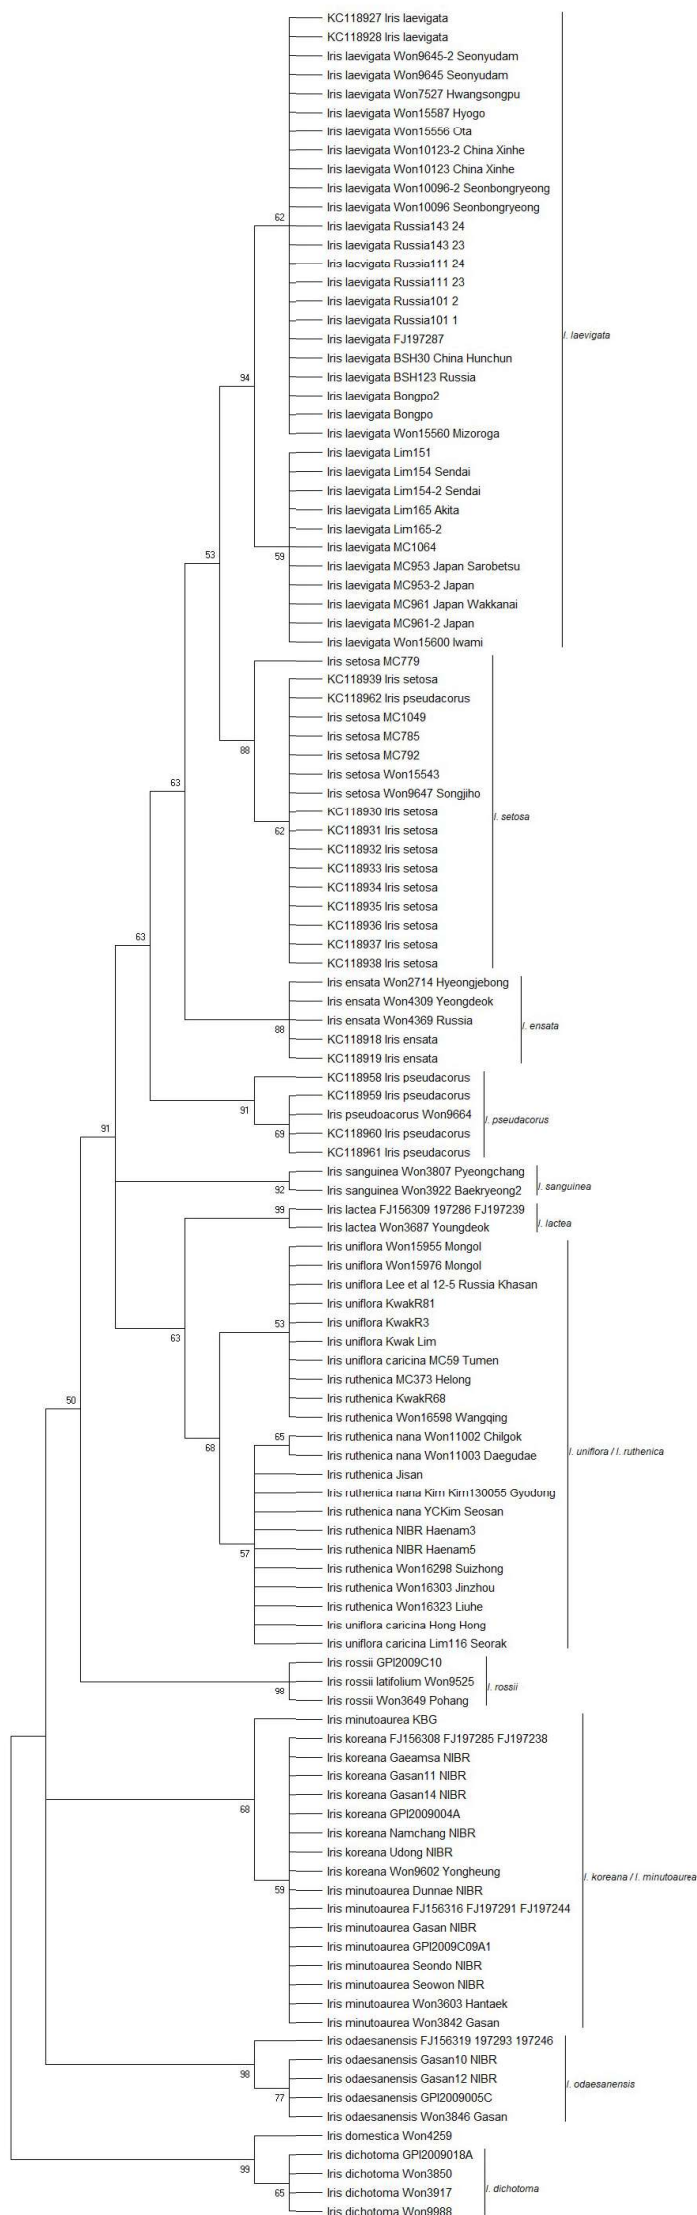

Supplement: pone.0241178.s001.pdf [file pone.0241178.s001.pdf]
